# Supplementary material for: Phase diagram and dynamics of the edge oxidation of C 3 N monolayers in O 2 atmosphere from first-principles calculations
Source: Royal Society of Chemistry journal article supplement (doi:10.1039/d5cp03700j), 2025-12-05
Supplement: d5cp03700j1.pdf [file d5cp03700j1.pdf]

# Supporting Information for Phase diagram and dynamics of edge oxidation of C<sub>3</sub>N monolayer in O<sub>2</sub> atmospheres from first-principles calculations

Zhongyue Li, Nan Zhao, Haitao Chen<sup>†</sup> and Liang Zhao<sup>†</sup>

<sup>a</sup>College of Physical Science and Technology, Yangzhou University, Jiangsu, 225009, China

<sup>†</sup>Corresponding authors: htchen@yzu.edu.cn; zhaoliang@yzu.edu.cn

## PS. 1. Atomic charges at C<sub>3</sub>NNR edges

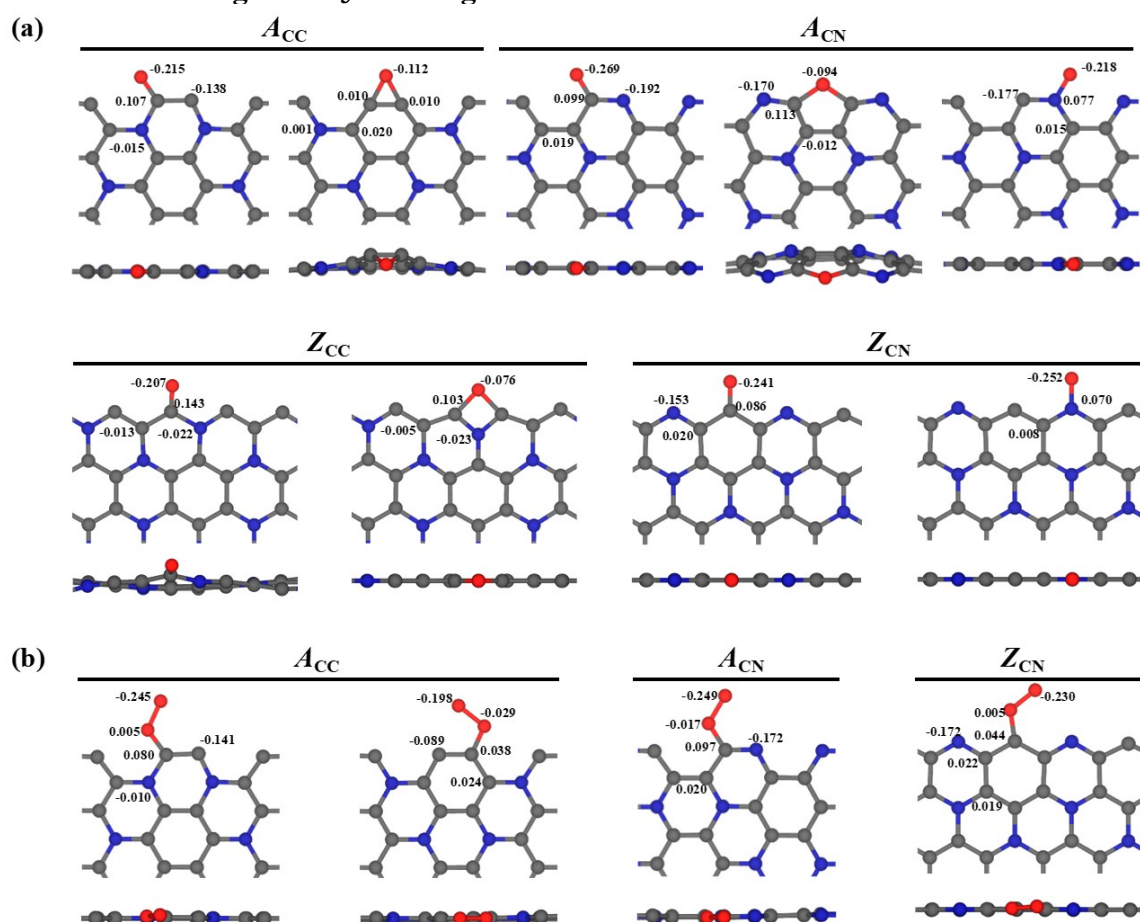

**Figure S1.** Hirshfeld charges of (a) single atomic O or (b) an O<sub>2</sub> chemisorbed at C<sub>3</sub>NNR edges, in the unit of  $e$ .

## PS. 2. All the optimized oxidation configurations for four types of C<sub>3</sub>NNR edges

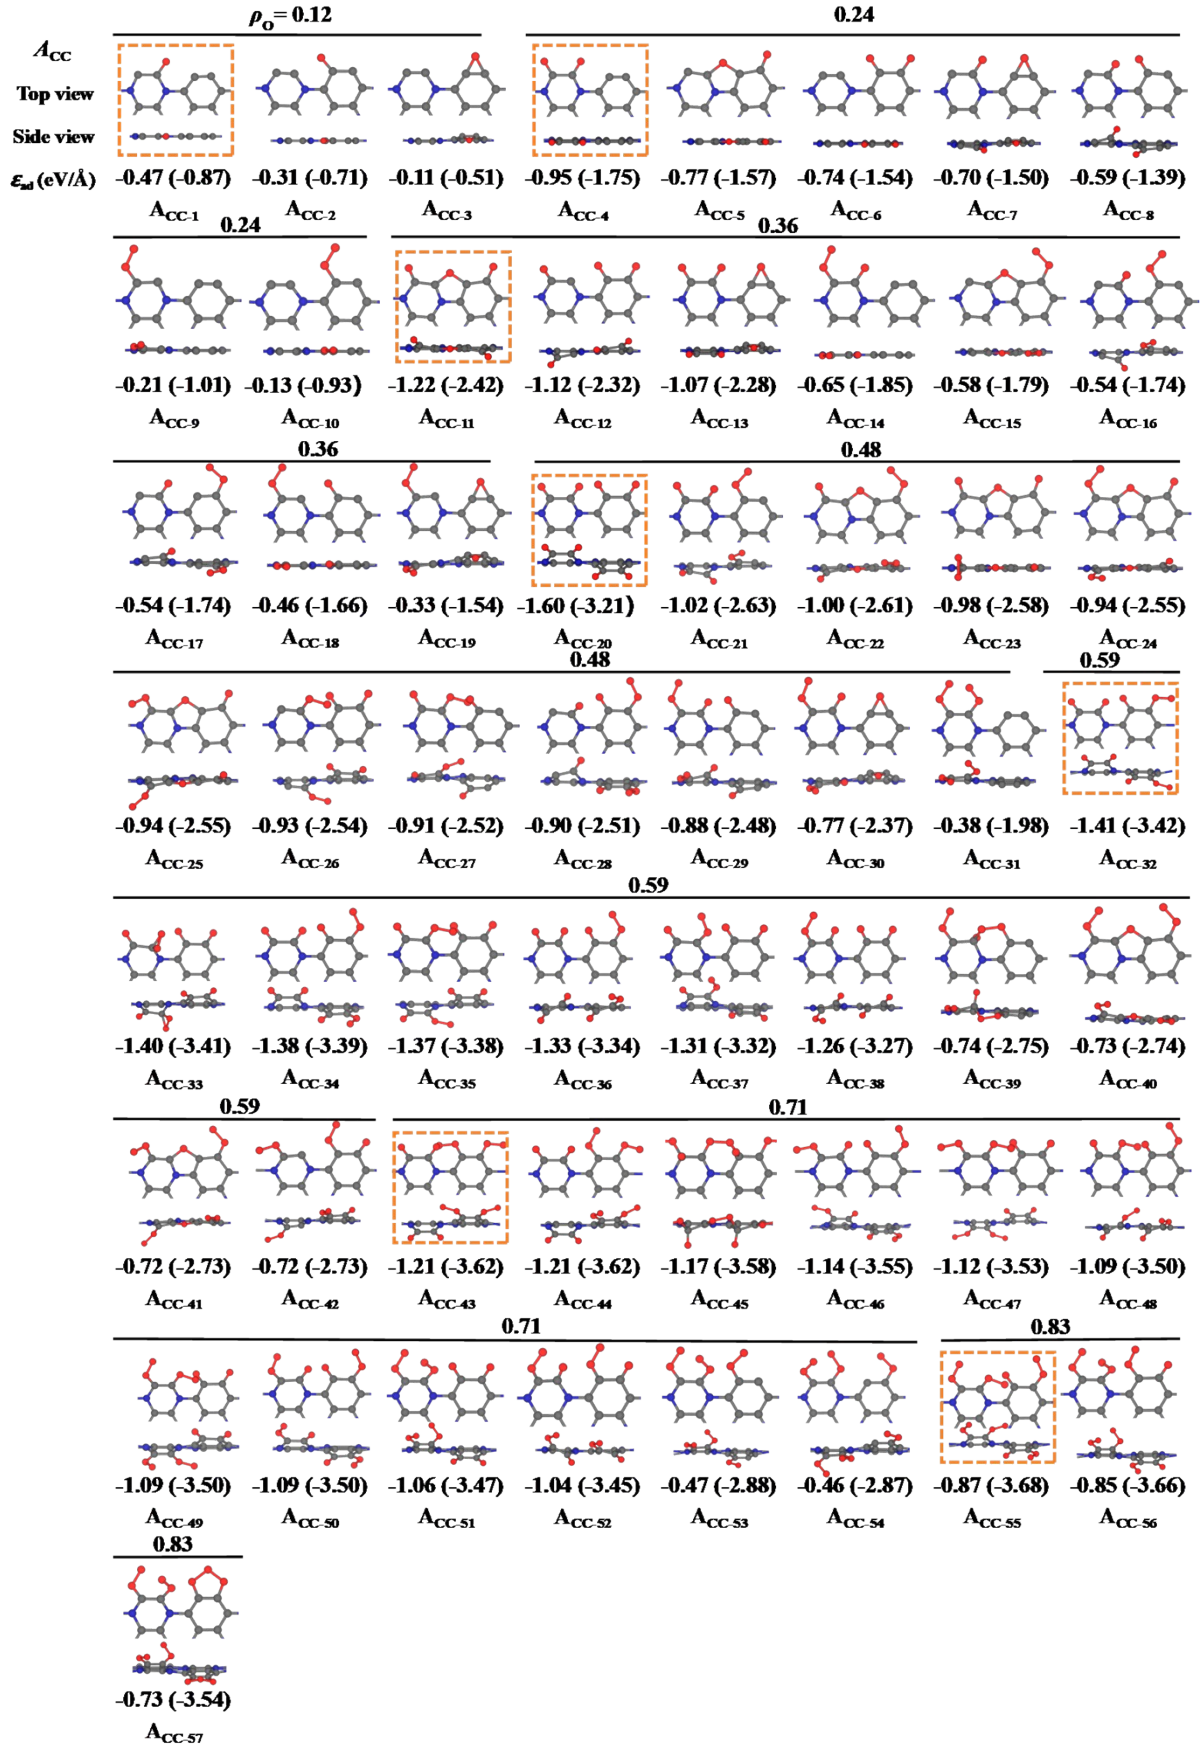

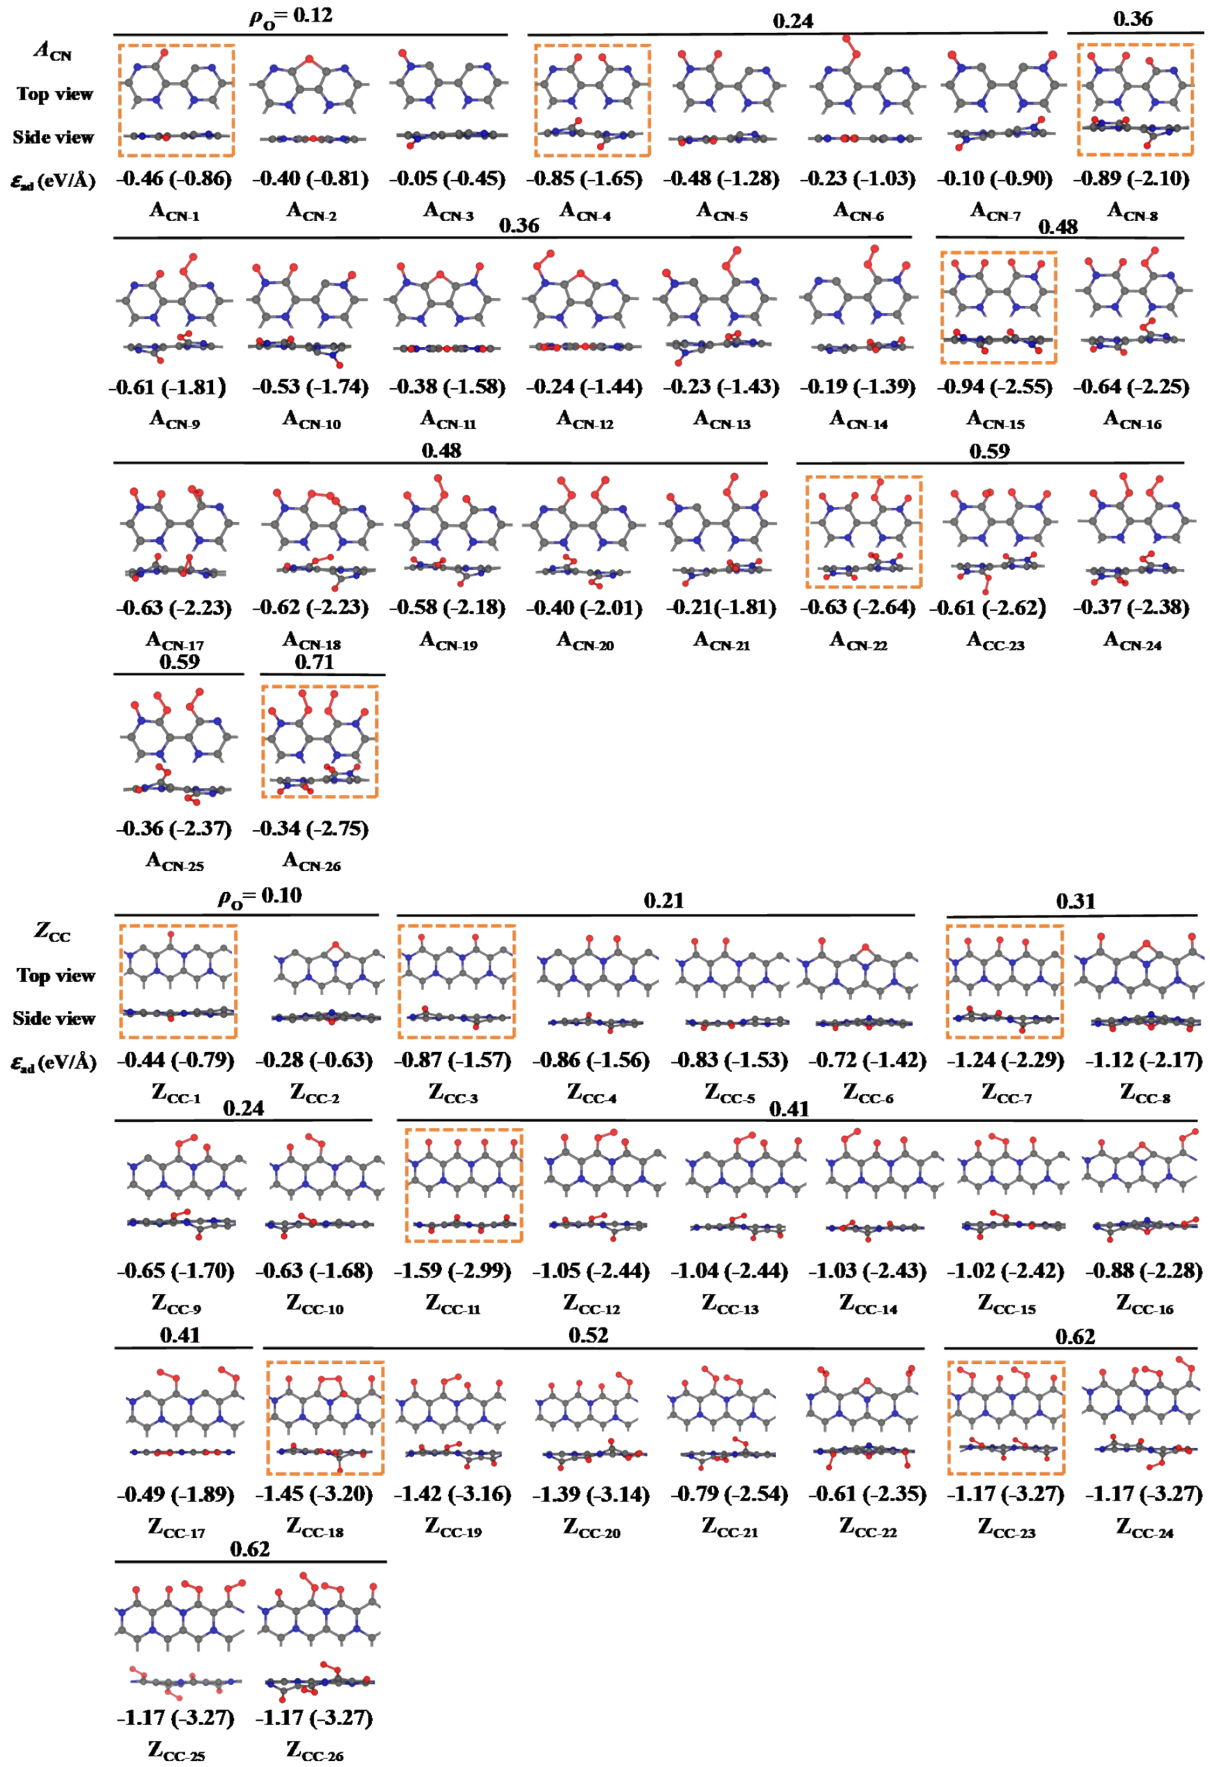

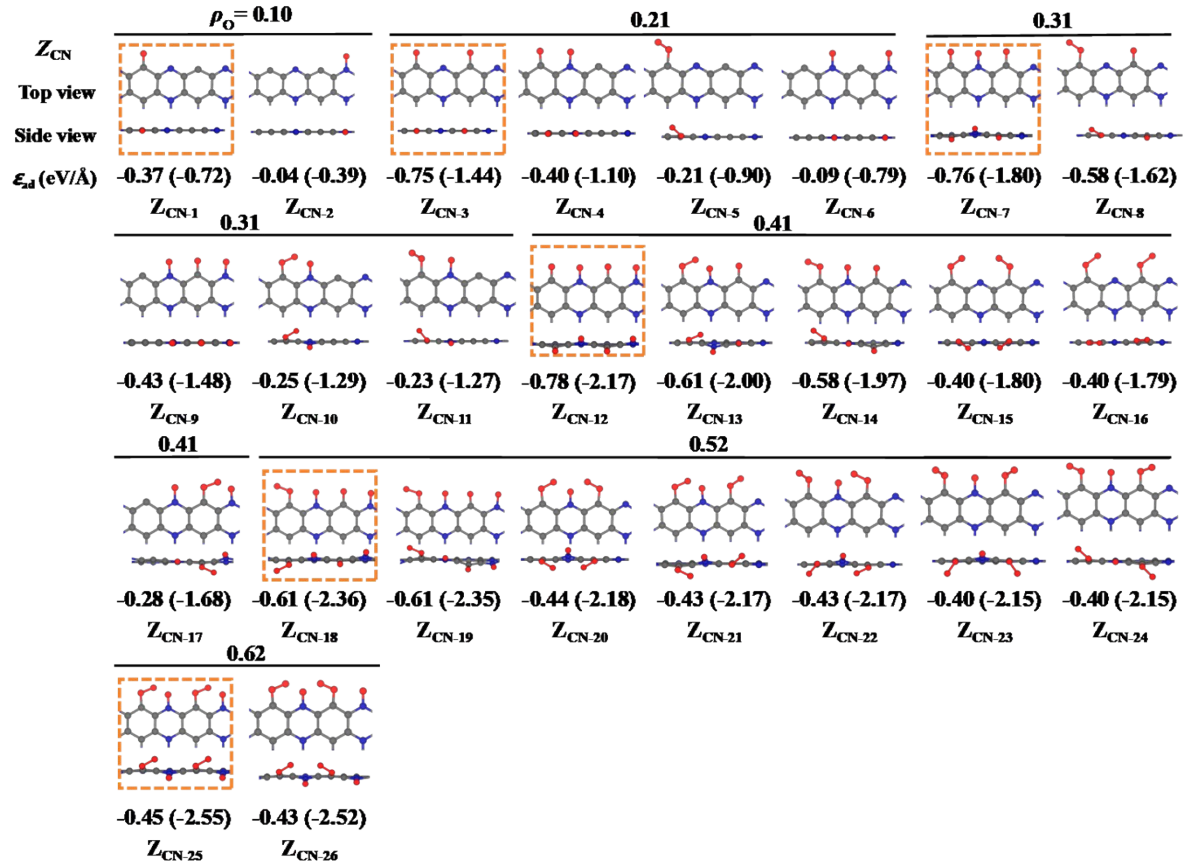

**Figure S2.** All the 135 optimized configurations of four distinct oxidized edges, denoted by  $A_{CC}$ ,  $A_{CN}$ ,  $Z_{CC}$  and  $Z_{CN}$ , at various oxygen densities  $\rho_O$ . The numbers above the black line and below the configurations represent the  $\rho_O$  and  $\epsilon_{ad}$ , respectively. The configurations below the same horizontal black line have the same value of  $\rho_O$  and they are sorted by increasing the  $\epsilon_{ad}$ . The orange dash frame highlights the configuration with the lowest  $\epsilon_{ad}$ . The value of  $\epsilon_{ad}$  inside or outside the bracket is calculated with reference to the atomic O or  $O_2$  state. Only edge atoms are shown here for clarity.

### PS. 3. Averaged height deviations of edge O atoms for four types of $C_3NNR$ edges

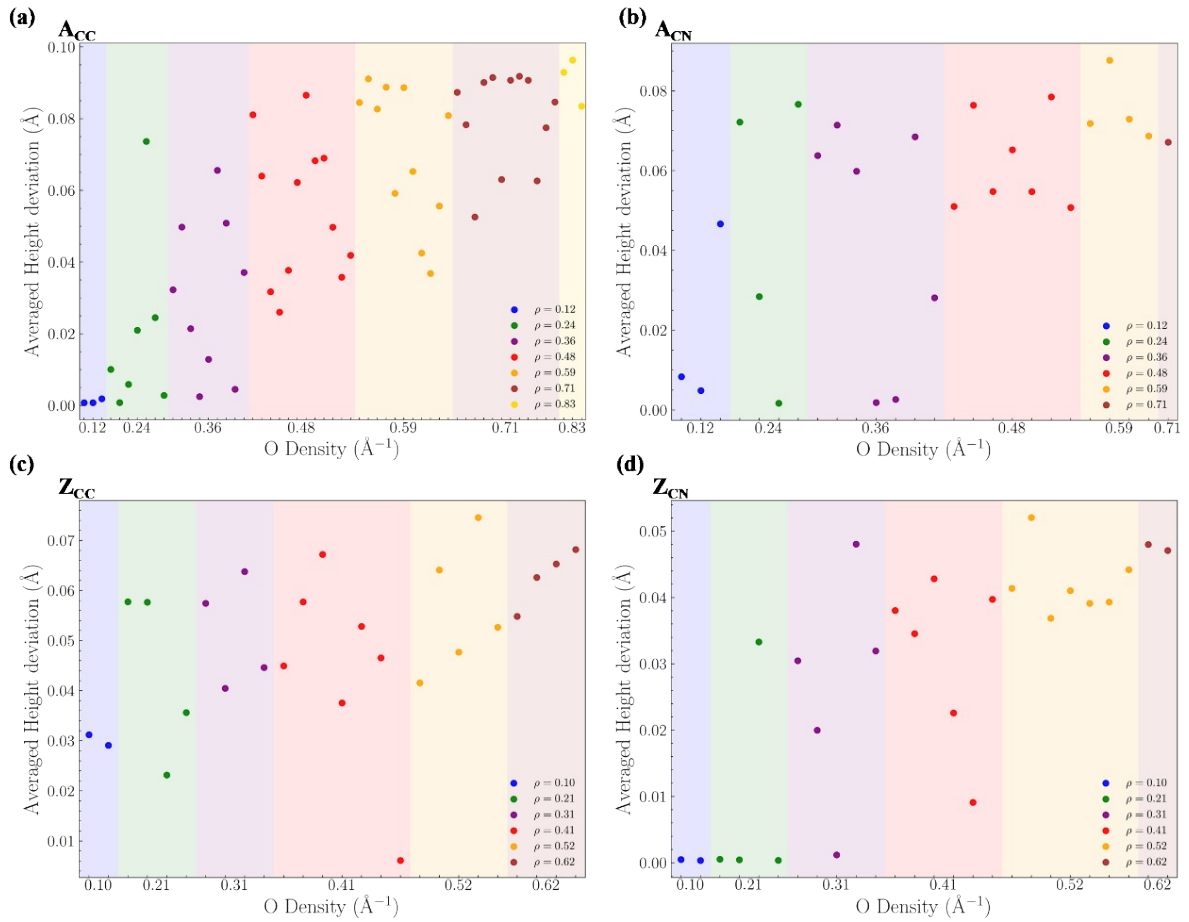

**Figure S3.** Averaged height deviations of edge O atoms from the C<sub>3</sub>N plane,  $\bar{d}$ , with respect to oxygen density  $\rho_{\text{O}}$ , for four types of C<sub>3</sub>NNR edges denoted by (a) A<sub>CC</sub>, (b) A<sub>CN</sub>, (c) Z<sub>CC</sub> and (d) Z<sub>CN</sub>. The  $\bar{d}$  is defined by the average value of all the vertical distances of the edge O atoms from the C<sub>3</sub>N plane. For each edge type, all the oxidation configurations are considered for analysis and the scatter dots belonging to the same O density is covered by transparent shaded area.

#### PS. 4. Bond lengths of edge atoms during edge oxidation in AIMD for four types of C<sub>3</sub>NNR edges



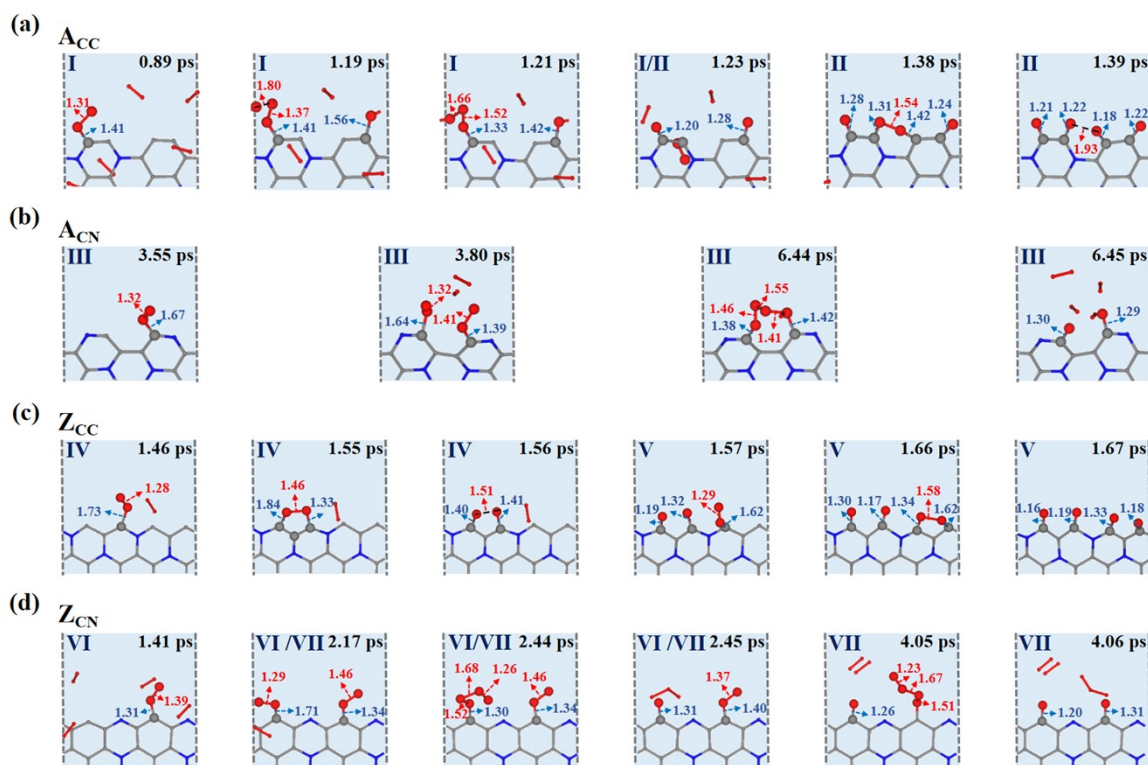

**Figure S4.** Bond lengths of edge atoms during edge oxidation in AIMD simulations for four types of  $C_3NNR$  edges, denoted by (a)  $A_{CC}$ , (b)  $A_{CN}$ , (c)  $Z_{CC}$  and (d)  $Z_{CN}$ . The carbon-oxygen, oxygen-oxygen bonds are shown by blue and red numbers in the unit of Å. In each snapshot, upper right number denotes the time. Snapshots with the same upper left characters belong to the same oxidation stage. The oxidized sites and the adsorbed atomic O or  $O_2$  are shown in balls to highlight the oxidation process. Only the edge atoms in the main system are shown within two gray dashed lines for clarity.

## PS. 5. Electronic band structure and DOS of the most stable oxidized configurations for four types of $C_3NNR$ edges

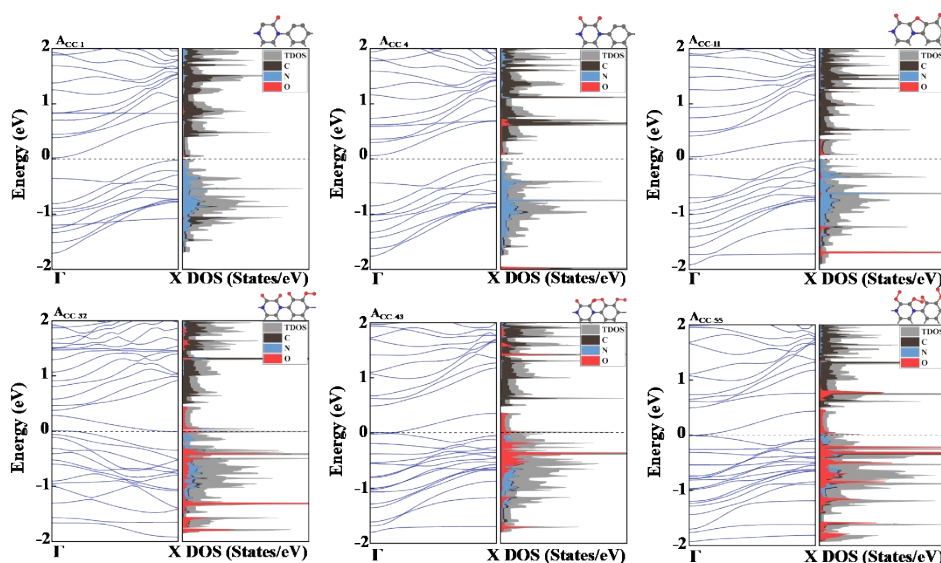

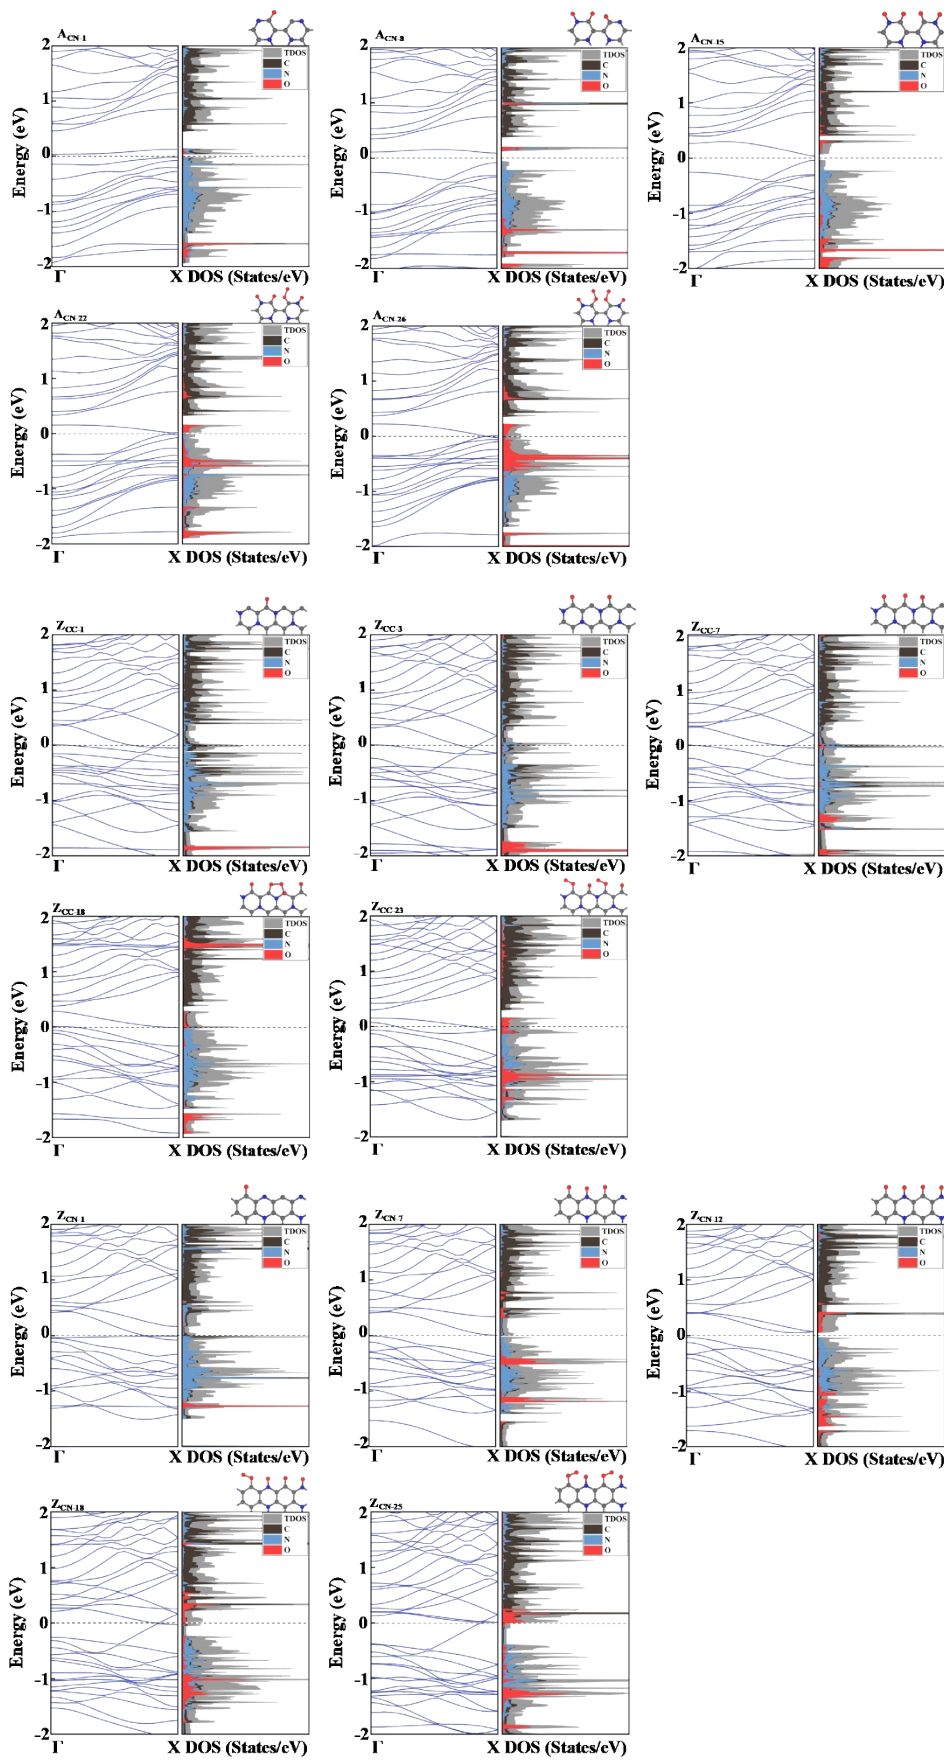

**Figure S5.** Electronic band structure and DOS of the most stable oxidation configurations at different oxygen densities for four types of C<sub>3</sub>NNR edges. The results for A<sub>CC-20</sub>, A<sub>CN-4</sub>, Z<sub>CC-11</sub> and Z<sub>CN-3</sub> have been shown as Figure 7 in the manuscript.
